# Supplementary material for: Identifying risk factors for L’Hermitte’s sign after IMRT for head and neck cancer
Source: Springer Nature journal article supplement (doi:10.1186/s13014-018-1015-0), 2018-05-04
Supplement: MOESM1 [file 15739760]

## Supplementary Material

**Figure S1:** *The relevant question from the clinical reporting form*

Do you experience tingling or electric shock sensation down your back?

0. Never
1. Occasional and mild
2. Sometimes but bearable
3. Often present or severe
4. Constant and very severe

**Figure S2:** Maximum spinal cord dose in patients with unilateral and bilateral neck radiation

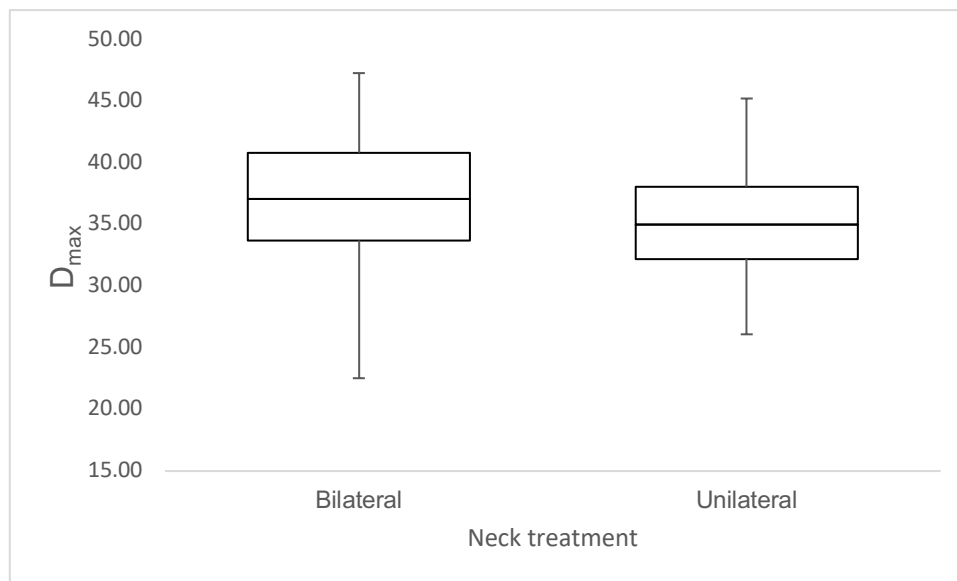

**Figure S3:** Dose parameters in patients with no LS symptoms (unshaded, n=75), and with LS (shaded, n=42) **A** – Dose to spinal cord. **B** – Volume of spinal cord receiving 10, 20, 30, and 40 Gy. **C** – Percentage of spinal cord receiving 10, 20, 30, and 40 Gy

**A**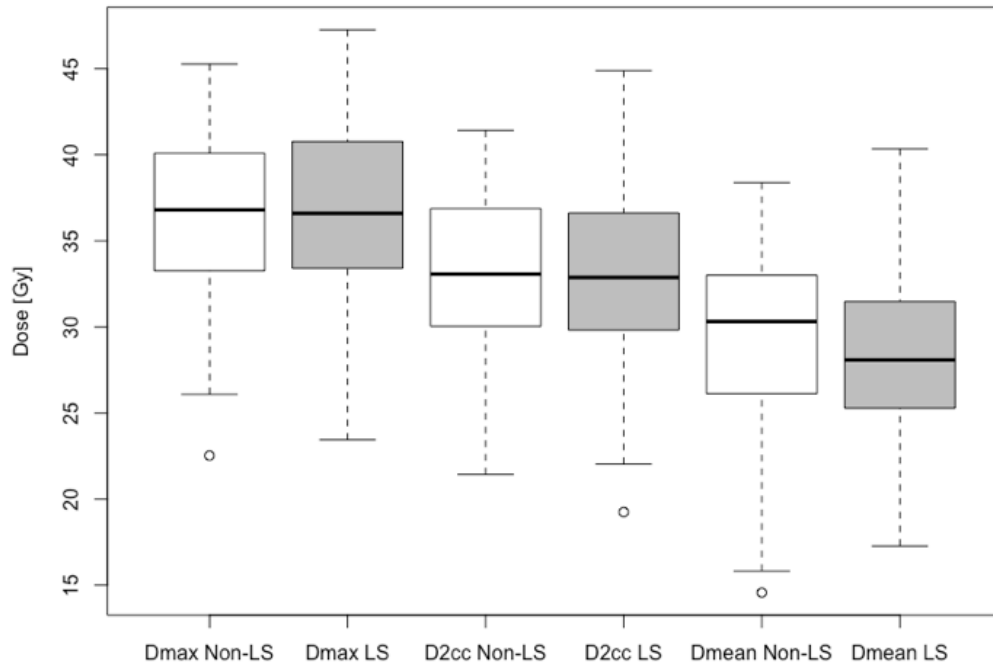**B**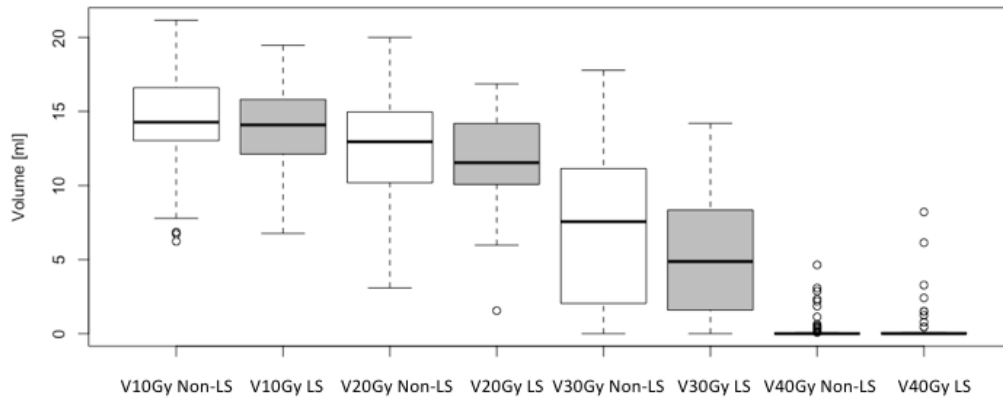**C**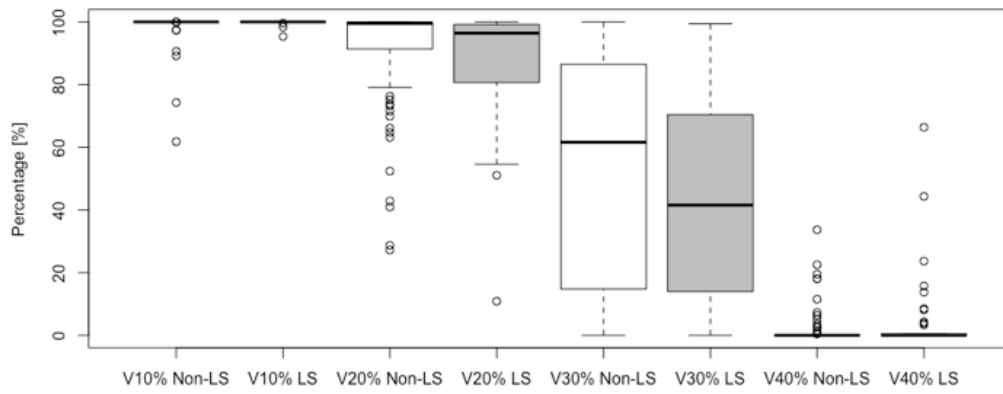

**Figure S4:** Dose parameter multi-collinearity scatter plots. **A** –  $V_{20\%}$  vs  $V_{30\%}$ . **B** –  $V_{20\%}$  vs  $V_{40\%}$

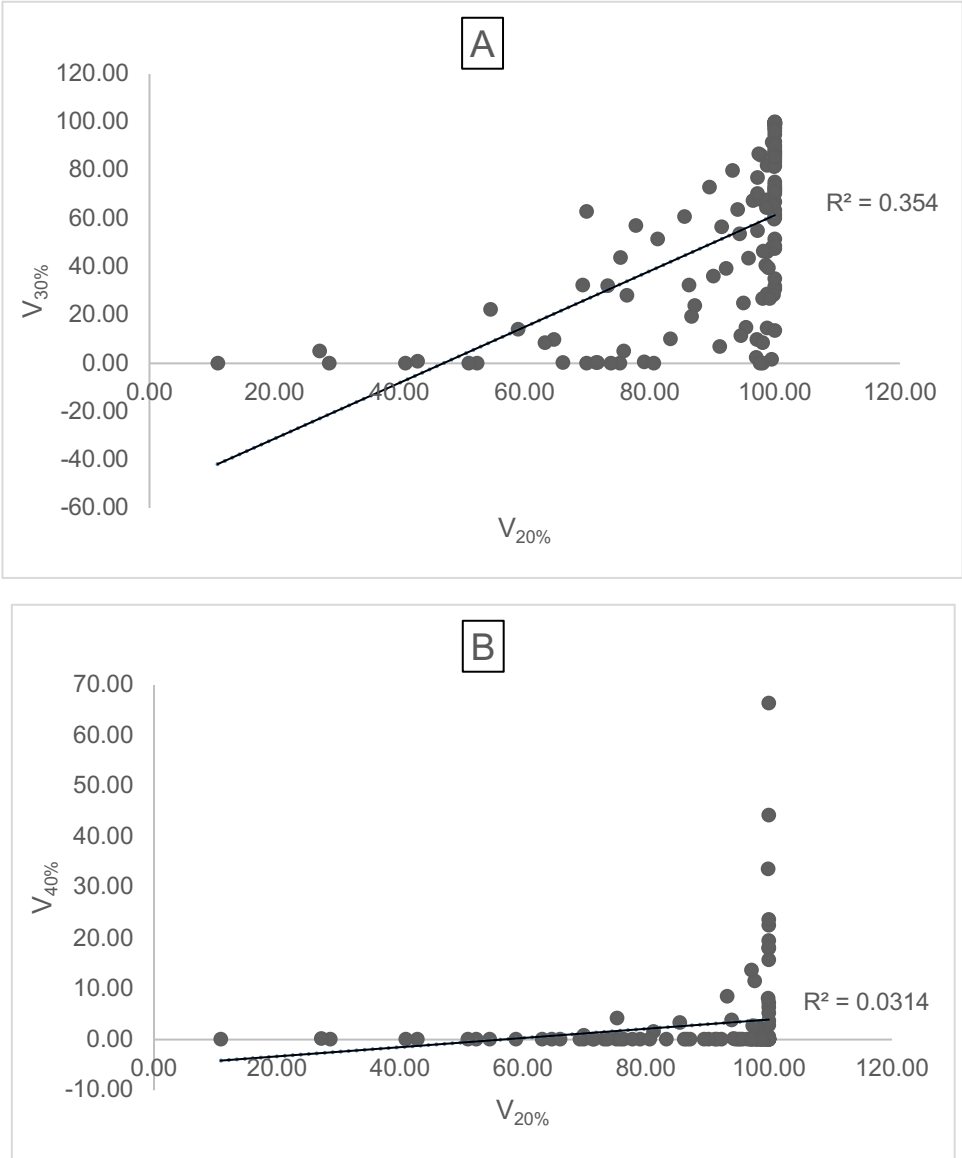

**Table S1 (A&B):** Collinearity Statistics for models containing V20%, V30%, and V40%

| <b>A</b><br>Model | Unstandardized Coefficients |            | Standardized Coefficients | t      | Sig. | Collinearity Statistics |       |
|-------------------|-----------------------------|------------|---------------------------|--------|------|-------------------------|-------|
|                   | B                           | Std. Error | Beta                      |        |      | Tolerance               | VIF   |
| (Constant)        | .434                        | .244       |                           | 1.782  | .077 |                         |       |
| V <sub>20%</sub>  | .001                        | .003       | .021                      | .188   | .851 | .642                    | 1.556 |
| V <sub>30%</sub>  | -.003                       | .002       | -.235                     | -1.929 | .056 | .562                    | 1.778 |
| V <sub>40%</sub>  | .012                        | .005       | .220                      | 2.213  | .029 | .843                    | 1.186 |

a. Dependent Variable: LS

| <b>B</b><br>Model | Unstandardized Coefficients |            | Standardized Coefficients | t      | Sig. | Collinearity Statistics |       |
|-------------------|-----------------------------|------------|---------------------------|--------|------|-------------------------|-------|
|                   | B                           | Std. Error | Beta                      |        |      | Tolerance               | VIF   |
| (Constant)        | .594                        | .232       |                           | 2.565  | .012 |                         |       |
| V <sub>20%</sub>  | -.003                       | .003       | -.106                     | -1.130 | .261 | .969                    | 1.032 |
| V <sub>40%</sub>  | .008                        | .005       | .151                      | 1.609  | .110 | .969                    | 1.032 |

a. Dependent Variable: LS

**Table S2:** Ordinal logistic regression with highest reported grade of LS as the dependent variable.

| <b>Independent Variable</b> | <b>Logistic regression coefficient</b> | <b>Regression p value</b> | <b>Odds Ratio<sup>a</sup> (95% CI)</b> |
|-----------------------------|----------------------------------------|---------------------------|----------------------------------------|
| <i>Original model</i>       |                                        |                           |                                        |
| <b>Age</b>                  | -0.049                                 | 0.027                     | 0.952 (0.91-0.99)                      |
| <b>V<sub>20%</sub></b>      | -0.009                                 | 0.559                     | 0.99 (0.96-1.23)                       |
| <b>V<sub>40%</sub></b>      | 0.032                                  | 0.157                     | 1.032 (0.89-1.08)                      |
| <b>HI</b>                   | 0.903                                  | 0.399                     | 2.5 (0.30 – 20)                        |
| <b>Laterality</b>           | -0.572                                 | 0.230                     | 0.564 (0.22-1.44)                      |
| <b>Diabetes</b>             | 1.738                                  | 0.090                     | 5.686 (0.76-42.52)                     |
| <b>Hypertension</b>         | 0.482                                  | 0.355                     | 1.619 (0.58-4.50)                      |
| <b>Cisplatin</b>            | 0.051                                  | 0.912                     | 1.052 (0.43-2.58)                      |
| <i>Refined model</i>        |                                        |                           |                                        |
| <b>Age</b>                  | -0.044                                 | 0.031                     | 0.957 (0.92-1.00)                      |
| <b>Diabetes</b>             | 1.875                                  | 0.065                     | 6.521 (0.89-47.61)                     |

Chi squared test  $\chi^2 (2) = 10.22$ ,  $p = 0.006$ . Pseudo- $R^2 = 0.047$  to  $0.099$ .

<sup>a</sup>Odds ratio per unit increase in variable or for bilateral radiation and being non-diabetic.

**Table S3:** Binary logistic regression with LS vs Non-LS as the dependent variable, and absolute dose volumes (in cc).

| <b>Independent Variable</b>                                                                                                                                                                                                  | <b>Logistic regression coefficient</b> | <b>Regression p value</b> | <b>Odds Ratio<sup>a</sup> (95% CI)</b> |
|------------------------------------------------------------------------------------------------------------------------------------------------------------------------------------------------------------------------------|----------------------------------------|---------------------------|----------------------------------------|
| <i>Original model</i>                                                                                                                                                                                                        |                                        |                           |                                        |
| <b>Age</b>                                                                                                                                                                                                                   | -0.042                                 | 0.080                     | 0.959 (0.92-1.01)                      |
| <b>Laterality</b>                                                                                                                                                                                                            | -1.096                                 | 0.039                     | 0.334 (0.12-0.95)                      |
| <b>Diabetes</b>                                                                                                                                                                                                              | 2.194                                  | 0.063                     | 8.972 (0.89-90.52)                     |
| <b>Hypertension</b>                                                                                                                                                                                                          | 0.439                                  | 0.429                     | 1.551 (0.52-4.60)                      |
| <b>Cisplatin</b>                                                                                                                                                                                                             | -0.495                                 | 0.335                     | 0.609 (0.22-1.67)                      |
| <b>V<sub>20Gy</sub></b>                                                                                                                                                                                                      | -0.114                                 | 0.094                     | 0.893 (0.78-1.02)                      |
| <b>V<sub>40Gy</sub></b>                                                                                                                                                                                                      | 0.532                                  | 0.025                     | 1.702 (1.07-2.71)                      |
| <b>HI</b>                                                                                                                                                                                                                    | 0.992                                  | 0.276                     | 2.70 (0.45-16.10)                      |
| <b>Constant</b>                                                                                                                                                                                                              | 1.093                                  |                           |                                        |
| <i>Refined model</i>                                                                                                                                                                                                         |                                        |                           |                                        |
| <b>Age</b>                                                                                                                                                                                                                   | -0.051                                 | 0.028                     | 0.951 (0.91-1.00)                      |
| <b>Laterality</b>                                                                                                                                                                                                            | -0.966                                 | 0.042                     | 0.381 (0.15-0.96)                      |
| <b>Diabetes</b>                                                                                                                                                                                                              | 2.388                                  | 0.033                     | 10.9 (1.21-98.5)                       |
| <b>V<sub>20Gy</sub></b>                                                                                                                                                                                                      | -0.119                                 | 0.056                     | 0.89 (0.79-1.0)                        |
| <b>V<sub>40Gy</sub></b>                                                                                                                                                                                                      | 0.513                                  | 0.025                     | 1.67 (1.07-2.62)                       |
| <b>Constant</b>                                                                                                                                                                                                              | 2.053                                  |                           |                                        |
| <p><i>Hosmer and Lemeshow test <math>\chi^2 (8) = 6.770, p = 0.562. Pseudo-R^2 = 0.16</math> to 0.22.</i></p> <p><sup>a</sup>Odds ratio per unit increase in variable or for bilateral radiation and being non-diabetic.</p> |                                        |                           |                                        |

**Table S4:** Ordinal logistic regression with highest reported grade of LS as the dependent variable, and absolute dose volumes (in cc).

| <b>Independent Variable</b> | <b>Logistic regression coefficient</b> | <b>Regression p value</b> | <b>Odds Ratio<sup>a</sup> (95% CI)</b> |
|-----------------------------|----------------------------------------|---------------------------|----------------------------------------|
| <i>Original model</i>       |                                        |                           |                                        |
| <b>Age</b>                  | -0.057                                 | 0.011                     | 0.945 (0.90-0.99)                      |
| <b>V<sub>20Gy</sub></b>     | -0.123                                 | 0.051                     | 0.884 (0.78-1.00)                      |
| <b>V<sub>40Gy</sub></b>     | 0.299                                  | 0.084                     | 1.349 (0.96-1.89)                      |
| <b>HI</b>                   | 0.762                                  | 0.363                     | 2.143 (0.41-11.07)                     |
| <b>Laterality</b>           | -0.610                                 | 0.200                     | 0.543 (0.21-1.38)                      |
| <b>Diabetes</b>             | 1.622                                  | 0.119                     | 5.063 (0.66-38.78)                     |
| <b>Hypertension</b>         | 0.568                                  | 0.283                     | 1.765 (0.63-4.98)                      |
| <b>Cisplatin</b>            | -0.054                                 | 0.907                     | 0.947 (0.38-2.36)                      |
| <i>Refined model</i>        |                                        |                           |                                        |
| <b>Age</b>                  | -0.062                                 | 0.005                     | 0.940 (0.90-0.98)                      |
| <b>Diabetes</b>             | 1.790                                  | 0.074                     | 5.989 (0.84-42.69)                     |
| <b>V<sub>20Gy</sub></b>     | -0.132                                 | 0.021                     | 0.876 (0.78-0.98)                      |
| <b>V<sub>40Gy</sub></b>     | 0.288                                  | 0.079                     | 1.334 (0.97-1.84)                      |

Chi squared test  $\chi^2 (4) = 17.31$ ,  $p = 0.002$ . Pseudo- $R^2 = 0.08$  to  $0.16$ .

<sup>a</sup>Odds ratio per unit increase in variable or for bilateral radiation and being non-diabetic.
